# Supplementary material for: Cutaneous and renal glomerular vasculopathy as a cause of acute kidney injury in dogs in the UK
Source: PubMed Central journal article supplement — Vet Rec. 2015 Mar 13;176(15):384. doi: 10.1136/vr.102892 (PMC4413843; doi:10.1136/vr.102892), 2015-03-13
Supplement: vetrec-2014-102892-s1.pdf [file vetrec-2014-102892-s1.pdf]

**Online Appendix A: Detailed results of quality assessment of quantitative studies**

| Author, year, reference                 | Quality Rating Components |   |   |              |   |   |   |                 |   |   |              |   |   |                             |   |   |                          |   |   |              | Global Score |   |   |   |   |   |    |
|-----------------------------------------|---------------------------|---|---|--------------|---|---|---|-----------------|---|---|--------------|---|---|-----------------------------|---|---|--------------------------|---|---|--------------|--------------|---|---|---|---|---|----|
|                                         | Selection Bias (A)        |   |   | Sampling (B) |   |   |   | Confounders (C) |   |   | Blinding (D) |   |   | Data collection methods (E) |   |   | Withdrawals/dropouts (F) |   |   | Analysis (G) | A            | B | C | D | E | F | GR |
|                                         | 1                         | 2 | R | 1            | 2 | 3 | R | 1               | 2 | R | 1            | 2 | R | 1                           | 2 | R | 1                        | 2 | R | 1            |              |   |   |   |   |   |    |
| Alajbegovic et al, 2002 <sup>27</sup>   | 2                         | 5 | 2 | 2            | - | - | 3 | 3               | 4 | 3 | 3            | 3 | 2 | 1                           | 1 | 1 | 4                        | 5 | 2 | 1            | 2            | 3 | 3 | 2 | 1 | 2 | 3  |
| Barnes et al, 2004 <sup>28</sup>        | 2                         | 1 | 2 | 2            | - | - | 3 | 3               | 4 | 3 | 3            | 3 | 2 | 3                           | 3 | 3 | 4                        | 5 | 2 | 1            | 2            | 3 | 3 | 2 | 3 | 2 | 3  |
| Blight et al, 2008 <sup>29</sup>        | 1                         | 2 | 2 | 1            | 1 | 1 | 1 | 3               | 4 | 3 | 3            | 3 | 2 | 1                           | 1 | 1 | 4                        | 2 | 2 | 1            | 2            | 1 | 3 | 2 | 1 | 2 | 2  |
| Chaaya et al, 2006 <sup>31</sup>        | 1                         | 1 | 1 | 1            | 1 | 1 | 1 | 3               | 4 | 3 | 3            | 3 | 2 | 1                           | 1 | 1 | 4                        | 1 | 1 | 1            | 1            | 1 | 3 | 2 | 1 | 1 | 2  |
| Creson et al, 1996 <sup>32</sup>        | 2                         | 5 | 2 | 2            | - | - | 3 | 3               | 4 | 3 | 3            | 3 | 2 | 3                           | 3 | 3 | 4                        | 5 | 2 | 1            | 2            | 3 | 3 | 2 | 3 | 2 | 3  |
| Delic-Ovcina, 2011 <sup>33</sup>        | 4                         | 5 | 3 | 2            | - | - | 3 | 3               | 4 | 3 | 3            | 3 | 2 | 1                           | 1 | 1 | 4                        | 5 | 2 | 1            | 3            | 3 | 3 | 2 | 1 | 2 | 3  |
| Eytan et al, 2011 <sup>34</sup>         | 1                         | 5 | 2 | 1            | 1 | 1 | 1 | 3               | 4 | 3 | 3            | 3 | 2 | 1                           | 1 | 1 | 4                        | 5 | 2 | 1            | 2            | 1 | 3 | 2 | 1 | 2 | 2  |
| Farhood et al, 2010 <sup>35</sup>       | 2                         | 1 | 2 | 2            | - | - | 3 | 2               | 4 | 3 | 3            | 3 | 2 | 1                           | 1 | 1 | 4                        | 1 | 1 | 1            | 2            | 3 | 3 | 2 | 1 | 1 | 3  |
| Giuliani et al, 2010 <sup>36</sup>      | 1                         | 1 | 1 | 1            | 1 | 1 | 1 | 3               | 4 | 3 | 3            | 3 | 2 | 1                           | 1 | 1 | 4                        | 1 | 1 | 1            | 1            | 1 | 3 | 2 | 1 | 1 | 2  |
| Giuliani et al, 2012 <sup>37</sup>      | 1                         | 1 | 1 | 1            | 1 | 1 | 1 | 3               | 4 | 3 | 3            | 3 | 2 | 1                           | 1 | 1 | 4                        | 1 | 1 | 1            | 1            | 1 | 3 | 2 | 1 | 1 | 2  |
| Harel-Ftsch et al, 2010 <sup>39</sup>   | 1                         | 5 | 2 | 1            | 1 | 1 | 1 | 3               | 4 | 3 | 3            | 3 | 2 | 1                           | 1 | 1 | 4                        | 5 | 2 | 1            | 2            | 1 | 3 | 2 | 1 | 2 | 2  |
| Harris et al, 2012 <sup>41</sup>        | 1                         | 5 | 2 | 2            | - | - | 3 | 3               | 4 | 3 | 3            | 3 | 2 | 3                           | 3 | 3 | 4                        | 5 | 2 | 1            | 2            | 3 | 3 | 2 | 3 | 2 | 3  |
| Harris et al, 2011 <sup>40</sup>        | 4                         | 5 | 3 | 2            | - | - | 3 | 3               | 4 | 3 | 3            | 3 | 2 | 3                           | 3 | 3 | 4                        | 5 | 2 | 1            | 3            | 3 | 3 | 2 | 3 | 2 | 3  |
| Helweg-Larsen et al, 2008 <sup>42</sup> | 4                         | 5 | 3 | 2            | - | - | 3 | 3               | 4 | 3 | 3            | 3 | 2 | 3                           | 3 | 3 | 4                        | 5 | 2 | 1            | 3            | 3 | 3 | 2 | 3 | 2 | 3  |
| Israelowitz et al, 2006 <sup>43</sup>   | 2                         | 5 | 2 | 2            | - | - | 3 | 3               | 4 | 3 | 3            | 3 | 2 | 3                           | 3 | 3 | 4                        | 5 | 2 | 1            | 2            | 3 | 3 | 2 | 3 | 2 | 3  |
| Keinan-Boker et al, 2011 <sup>44</sup>  | 1                         | 3 | 3 | 2            | - | - | 3 | 3               | 4 | 3 | 3            | 3 | 2 | 3                           | 3 | 3 | 4                        | 3 | 3 | 1            | 3            | 3 | 3 | 2 | 3 | 3 | 3  |
| Khader et al, 2009 <sup>45</sup>        | 1                         | 1 | 1 | 1            | 1 | 1 | 1 | 3               | 4 | 3 | 3            | 3 | 2 | 1                           | 1 | 1 | 4                        | 1 | 1 | 1            | 1            | 1 | 3 | 2 | 1 | 1 | 2  |
| Koupil et al, 2007 <sup>47</sup>        | 1                         | 2 | 2 | 1            | 2 | 2 | 2 | 3               | 4 | 3 | 3            | 3 | 2 | 1                           | 1 | 1 | 4                        | 5 | 2 | 1            | 2            | 2 | 3 | 2 | 1 | 2 | 2  |

|                                           |   |   |   |   |   |   |   |   |   |   |   |   |   |   |   |   |   |   |   |   |   |   |   |   |   |   |   |
|-------------------------------------------|---|---|---|---|---|---|---|---|---|---|---|---|---|---|---|---|---|---|---|---|---|---|---|---|---|---|---|
| Leavey et al, 2004 <sup>48</sup>          | 2 | 2 | 2 | 2 | - | - | 3 | 3 | 4 | 3 | 3 | 3 | 2 | 1 | 1 | 1 | 4 | 2 | 2 | 1 | 2 | 3 | 3 | 2 | 1 | 2 | 3 |
| Luitel et al, 2013 <sup>49</sup>          | 1 | 1 | 1 | 2 | - | - | 3 | 3 | 4 | 3 | 3 | 3 | 2 | 1 | 1 | 1 | 4 | 1 | 1 | 1 | 1 | 3 | 3 | 2 | 1 | 1 | 3 |
| Maksimovic et al, 2011 <sup>51</sup>      | 2 | 1 | 2 | 2 | - | - | 3 | 3 | 4 | 3 | 3 | 3 | 2 | 1 | 1 | 1 | 4 | 1 | 1 | 1 | 2 | 3 | 3 | 2 | 1 | 1 | 3 |
| McLeod et al, 2005 <sup>52</sup>          | 2 | 5 | 2 | 2 | - | - | 3 | 3 | 4 | 3 | 3 | 3 | 2 | 1 | 1 | 1 | 4 | 5 | 2 | 1 | 2 | 3 | 3 | 2 | 1 | 2 | 3 |
| Morikawa, 2001 <sup>53</sup>              | 3 | 1 | 2 | 2 | - | - | 3 | 3 | 4 | 3 | 3 | 3 | 2 | 3 | 3 | 3 | 4 | 5 | 2 | 1 | 2 | 3 | 3 | 2 | 3 | 2 | 3 |
| Mousa et al, 2010 <sup>54</sup>           | 2 | 5 | 2 | 2 | - | - | 3 | 3 | 4 | 3 | 3 | 3 | 2 | 1 | 1 | 1 | 4 | 5 | 2 | 1 | 2 | 3 | 3 | 2 | 1 | 2 | 3 |
| Nguyen-Van-Tam et al, 1995 <sup>55</sup>  | 2 | 1 | 2 | 2 | - | - | 3 | 3 | 4 | 3 | 3 | 3 | 2 | 3 | 3 | 3 | 4 | 5 | 2 | 1 | 2 | 3 | 3 | 2 | 3 | 2 | 3 |
| Okello et al, 2014 <sup>56</sup>          | 2 | 1 | 1 | 2 | - | - | 3 | 3 | 4 | 3 | 3 | 3 | 2 | 1 | 1 | 1 | 4 | 5 | 2 | 1 | 2 | 3 | 3 | 2 | 1 | 2 | 3 |
| Roberts et al, 2013 <sup>57</sup>         | 1 | 2 | 2 | 1 | 1 | 1 | 1 | 3 | 1 | 3 | 3 | 3 | 2 | 1 | 1 | 1 | 4 | 2 | 2 | 1 | 2 | 3 | 3 | 2 | 1 | 2 | 2 |
| Rudatsikira et al 2012 <sup>58</sup>      | 1 | 1 | 1 | 1 | 1 | 1 | 1 | 3 | 4 | 3 | 3 | 3 | 2 | 1 | 1 | 1 | 4 | 5 | 2 | 1 | 2 | 3 | 3 | 2 | 1 | 2 | 2 |
| Sharon et al, 2009 <sup>59</sup>          | 2 | 2 | 2 | 2 | - | - | 3 | 3 | 4 | 3 | 3 | 3 | 2 | 1 | 1 | 1 | 4 | 2 | 2 | 1 | 2 | 3 | 3 | 2 | 1 | 2 | 3 |
| Siziya et al, 2007 <sup>60</sup>          | 1 | 2 | 1 | 1 | 1 | 1 | 1 | 3 | 4 | 3 | 3 | 3 | 2 | 1 | 1 | 1 | 4 | 5 | 2 | 1 | 2 | 3 | 3 | 2 | 1 | 2 | 2 |
| Siziya et al, 2008 <sup>61</sup>          | 1 | 1 | 1 | 1 | 1 | 1 | 1 | 3 | 4 | 3 | 3 | 3 | 2 | 1 | 1 | 1 | 4 | 5 | 2 | 1 | 2 | 3 | 3 | 2 | 1 | 2 | 2 |
| Sokolova-Djokic et al, 2008 <sup>62</sup> | 1 | 5 | 2 | 1 | 1 | 1 | 1 | 3 | 4 | 3 | 3 | 3 | 2 | 3 | 3 | 3 | 4 | 5 | 2 | 1 | 2 | 3 | 3 | 2 | 3 | 2 | 3 |
| Stoll, 2008 <sup>63</sup>                 | 2 | 5 | 2 | 2 | - | - | 3 | 3 | 4 | 3 | 3 | 3 | 2 | 1 | 1 | 1 | 4 | 5 | 2 | 1 | 2 | 3 | 3 | 2 | 1 | 2 | 3 |
| Turek et al, 2001 <sup>64</sup>           | 1 | 5 | 2 | 1 | 1 | 1 | 1 | 3 | 4 | 3 | 3 | 3 | 2 | 1 | 1 | 1 | 4 | 5 | 2 | 1 | 2 | 3 | 3 | 2 | 1 | 2 | 2 |
| Weaver et al, 2008 <sup>65</sup>          | 2 | 5 | 2 | 2 | - | - | 3 | 3 | 4 | 3 | 3 | 3 | 2 | 1 | 1 | 1 | 4 | 5 | 2 | 1 | 2 | 3 | 3 | 2 | 1 | 2 | 3 |

R = Rating; GR = Global Rating; - = Not applicable

Quality rating based on EPHPP tool<sup>25</sup>. A1=representation; A2=response rate; B1randomisation used; B2=randomization method described; B3=randomization method appropriateness; C1=group differences; C2=controlling of confounders; D1=assessor blinding; D2=participant blinding; E1=data collection tool validity; E2= data collection tool reliability; F1=withdrawal/drop outnumbers/reasons; F2=completion rate; G1=appropriate statistical methods.

A component rating (R) is produced for each component (except G): 1 = 'strong'; 2 = 'moderate'; 3 = 'weak'. A Global Rating (GR) is then produced from component ratings for A to F: 3 = 'weak' – having two or more weak component ratings; 2 = 'moderate' – having only one weak component rating, and 1 = 'strong' – having no weak component rating. As none of the selected studies were intervention studies, adaptations were made for elements relating to intervention studies.
