# Supplementary material for: Cutaneous and renal glomerular vasculopathy as a cause of acute kidney injury in dogs in the UK
Source: PubMed Central journal article supplement — Vet Rec. 2015 Mar 13;176(15):384. doi: 10.1136/vr.102892 (PMC4413843; doi:10.1136/vr.102892), 2015-03-13
Supplement: vetrec-2014-102892-s2.pdf [file vetrec-2014-102892-s2.pdf]

**Online Appendix B: Detailed results of quality assessment of qualitative studies**

| Author, year, reference                   | Quality assessment criteria |              |            |     |                         |    |        |          |          |     | Total number of: |    |            | Overall grading |
|-------------------------------------------|-----------------------------|--------------|------------|-----|-------------------------|----|--------|----------|----------|-----|------------------|----|------------|-----------------|
|                                           | Research aim                | Study design |            |     | Data collection methods |    | Ethics | Analyses | Findings |     | Yes              | No | Can't tell |                 |
|                                           | 1                           | 2            | 3          | 4   | 5                       | 6  | 7      | 8        | 9        | 10  |                  |    |            |                 |
| Cajdric-Vrhovac et al, 2009 <sup>30</sup> | Yes                         | Yes          | Can't tell | Yes | Yes                     | No | No     | Yes      | Yes      | Yes | 7                | 2  | 1          | Moderate        |
| Giuliani et al, 2008 <sup>38</sup>        | Yes                         | Yes          | Can't tell | Yes | Yes                     | No | No     | No       | Yes      | Yes | 6                | 3  | 1          | Moderate        |
| Kopinak, 1999 <sup>46</sup>               | Yes                         | Yes          | Yes        | Yes | Yes                     | No | No     | Yes      | Yes      | Yes | 8                | 2  | 0          | Weak            |
| Makhoul et al, 2009 <sup>50</sup>         | Yes                         | Yes          | Can't tell | Yes | Yes                     | No | Yes    | Yes      | Yes      | Yes | 8                | 1  | 1          | Weak            |
| Stoll, 2008 <sup>63</sup>                 | Yes                         | Yes          | Can't tell | Yes | Yes                     | No | No     | Yes      | Yes      | Yes | 7                | 2  | 1          | Moderate        |

Assessment used the Critical Appraisal Skills Programme (CASP) tool.<sup>26</sup> Each section is related to different components of the study: 1=Research aim; 2=research method; 3=research design; 4=recruitment; 5=data collection; 6=researcher/participant relations; 7=ethical consideration; 8=analysis; 9=statement of findings; 10=research value, with each 'Yes' translated to a score of 1. The scores of 8 to 10 categorised as 'strong'; 5 to 7 as 'moderate'; and 1 to 4 as 'weak'.
